# Supplementary material
Source: HighWire-hosted journal article supplement (https://bjgp.org/highwire/filestream/43198/field_highwire_adjunct_files/0/BJGP.2021.0564_suppl.pdf)
Supplement: BJGP.2021.0564_suppl.pdf [file BJGP.2021.0564_suppl.pdf]

**The effectiveness and acceptability of urine collection devices to reduce contaminated urine samples in women presenting with symptoms of urinary tract infection.**

**Supplementary Appendix S1. Participant interviews: topic guide**

*1. Introduction*

Explain purpose of interview and audio recording procedures, and their confidentiality. Answer any questions. Begin audio recording. Ensure participant has given informed consent.

*2. First thoughts about the device*

**Tell me a bit about how you came to be in the study**

- What were you hoping for when you came to see the GP? (Did you expect to be asked to provide a urine sample? Did you want to? Did you mind?)
- Have you been aware that urine specimens can be contaminated? What are your thoughts/experiences about this?
- How often have you had UTIs in the past?
- How often have you given urine samples in the past? What's it been like when you've had to do those?
- What did you think when you were offered the chance to be in a trial of urine collection devices?
- Was there anything that put you off wanting to use a device when the GP suggested it? (Were you concerned about any aspect of the device? Did you think it would work when you saw it? Did you think you would be able to see what you were doing?)

*3. Using the device*

- What did you think about the device when you were given it?
- How did you learn to use the device? How easy was it to understand the instructions?
- Did you read the instructions or were they explained to you?
- How easy was it to use? (Did it make the process of urine collection more complicated/simpler? did it make urine collection shorter/longer?)
- What could have made it easier for you to use? What would improve it as far as you are concerned?
- Were there any issues about the quantity of urine you were able to produce?
- What were your thoughts about the device after using it (Was it messy or clean? How hygienic did you feel it was? Did you know what to do with it after it was used? Was there a bin nearby? How did you feel about the disposal and the waste side of things?)
- How did the device compare to using cups/ pots to collect urine?
- Can you remember the name of the device you used?

*4. Future use of the test*

- Do you think the urine collection device should be used in the future? In your practice, and across the country? Why? (In what situations? Would you want to use it again?)
- Would the device be something you might buy to keep at home or would you only use it if it was offered to you at the surgery?
- (If prescribed antibiotics – In terms of outcome – how would you have felt if your doctor hadn't prescribed antibiotics but asked you to wait and see how things went or just recommended that you took ibuprofen?)

5. *Any other remarks?*

6. *Close*

Thank participant.

End audio recording.

*Note: this is a flexible topic guide, for guidance only. It will be edited through the course of the study.*
